# Supplementary material for: The Proteins API: accessing key integrated protein and genome information
Source: PubMed Central journal article supplement (PMC5570157; doi:10.1093/nar/gkx237), 2017-04-05
Supplement: gkx237_Supp.pdf [file gkx237_Supp.pdf]

# Supplementary Data for Wilson Disease Example Use Case

## Step 1: Search for proteins associated with Wilson disease

Here the *Variation* service was used to find any protein that is associated with Wilson disease and any associated variants. Figure 1 (a and b) shows the Swagger User Interface (UI) for the *Variation* service with Wilson disease added to the disease search field. Figure 1b illustrates the results after execution of the search in the response body, with a Curl command defined that is also available in Figure 2 with Figure 3 defining a Python script to execute this search.

The screenshot shows the Swagger UI for the `variation` service. The endpoint is `GET /variation` with the operation `get variation by search`. The implementation notes state: "with query feature type and query terms". The response class is `Status 200` for a "successful operation". An example JSON response is shown in a yellow box:

```
{  "alternativeSequence": "string",  "begin": "string",  "end": "string",  "xrefs": [    {      "name": "string",      "id": "string"    }  ]}
```

The response content type is `application/json`. Below the response, a table lists the parameters for the endpoint:

| Parameter                         | Value                | Description                                                                                                                                                                      | Parameter Type | Data Type |
|-----------------------------------|----------------------|----------------------------------------------------------------------------------------------------------------------------------------------------------------------------------|----------------|-----------|
| <code>sourcetype</code>           | <input type="text"/> | Filter for variants from a specific sourceType. Options include: uniprot, large_scale_study and msaed, or individual data source such as esic, cosmic curated, esp, 1000genomes. | query          | string    |
| <code>consequencetype</code>      | <input type="text"/> | Filter for variants with a specific consequenceType. Options include: missense, stop gained or stop lost                                                                         | query          | string    |
| <code>wildtype</code>             | <input type="text"/> | Search by specific wildType amino acid. Options: Any single letter amino acid and * for stop codon.                                                                              | query          | string    |
| <code>alternativesequences</code> | <input type="text"/> | Filter by specific alternativeSequence amino acid. Options: Any single letter amino acid and * for stopcodon and - for deletions.                                                | query          | string    |
| <code>location</code>             | <input type="text"/> | Filter by amino acid position in the sequence(s). Options: any valid amino acid position within the length of the protein sequence                                               | query          | string    |
| <code>accession</code>            | <input type="text"/> | search for accession, can be a list separated by ','                                                                                                                             | query          | string    |

Figure 1a: Variation service Swagger UI top.

Proteins  
 Proteins inc. isoforms  
 Features  
 Variation  
 Proteomics  
 Antigen  
 Proteomes  
 Taxonomy  
 Coordinates

|          |                                             |                                                                                                                 |       |         |
|----------|---------------------------------------------|-----------------------------------------------------------------------------------------------------------------|-------|---------|
| disease  | <input type="text" value="Wilson disease"/> | Search for variants by disease name or acronym. For example: alzheimer disease 1 or AD1. Partial names allowed. | query | string  |
| omim     | <input type="text"/>                        | Search for variants by MIM Identifier. For example: 104300                                                      | query | string  |
| evidence | <input type="text"/>                        | Search for variants by PubMed identifier. For example: 22472873                                                 | query | string  |
| taxid    | <input type="text"/>                        | Organism taxonomy id                                                                                            | query | string  |
| offset   | <input type="text" value="0"/>              | Off set, page starting point                                                                                    | query | integer |
| size     | <input type="text" value="100"/>            | Page size                                                                                                       | query | integer |

Response Messages Show Response

Request Sample Code

curl [Perl](#) [Python](#) [Ruby](#) [Java](#)

```
curl -X GET --header 'Accept:application/json'
'https://www.ebi.ac.uk/proteins/api/variation?
disease=Wilson%20disease&offset=0&size=100'
```

Request URL

```
https://www.ebi.ac.uk/proteins/api/variation?disease=Wilson%20disease&offset=0&size=100
```

Response Body

```
{
  {
    "accession": "P35670",
    "entryName": "ATP7B_HUMAN",
    "sequence":
    "MPDQRQITAREGASRKLKSLPLTRAMEPANKKSFAPDNVYEGGLDGLGSPQVATSTVRIILGNTQSCVKSIEDRIS
    NLKGIISKRVLEQGSATVKYVSVVCLQQVCHQIGMGFEASIAEGKASHPRSLEPAQEAIVKLRVEGTCQSCVSSIEG
    KVRKLQVVRVLSLNSQEAIVITQPYLIQPEDLRHVNDMGFEAAIKSKVAPLSLGIPIERLQSTNPKRPLSSANQFN
    SETLGHQSHVVTQLRIRDGMHCSCVLNIEENIQLLGVQSIQVLENKTAQVKYVDSCTSPVALQRAIEALPPGNFVSL
    PDGARGGTDHRSSESSPGSPRRNQVGTCTTLIATAGMTCASCVHSIEGMIQLEGVQVQISVLEAGZATVLYNPEVLS
    PEELRAAIEDMGFEASVSSCSNPLGNHSAQNSMVTGDTPTSVQEVAPHTGRLEPAHAFDILAKSPQSTRAVAPQKCF
    LQIKGNTCASCVSNIERNLQKEAGVLSVLVLMAGKAEIRYDPTVQPLEIAQFIQDLGFEAAVMEYAGSDGNIELTITGM
    TCASCVENIESKLTNNGITYASVALATSKALVKFPEIIGPRDIKIIEEIGFHASLAQRNPAHLEHDKMEIQKHKSF
    CSLVFGIPVHALMIYMLIPSEHPQSHVLDHNIIPGLSILNLIFFILCTFVQLGGVFTVQVYKSLRHSANMVLIVLAT
    STAYVYSLVILVVAEKAERSPTVFFDTPMLFVFIALGRMLEHAKSRTSEALAKLMSLQATEATVVTLGEDNLIIREQ
```

Response Code

```
200
```

Response Headers

```
{
  "x-pagination-totalrecords": "1",
  "link": "<http://www.ebi.ac.uk/proteins/api/variation?
disease=Wilson&disease&offset=0&size=100>; rel='self'>
<http://www.ebi.ac.uk/proteins/api/variation?disease=Wilson&disease&offset=0&size=100>;
rel='first'>, <http://www.ebi.ac.uk/proteins/api/variation?
disease=Wilson&disease&offset=0&size=100>; rel='last'>",
  "content-type": "application/json"
}
```

**Figure 1b:** Variation service Swagger UI bottom with Wilson disease added to the disease search field. The search has already been executed by clicking on 'Try Out' and the results of the search are available in JSON in the 'Response Body'.

```
curl -X GET --header 'Accept:application/json'
'https://www.ebi.ac.uk/proteins/api/variation?disease=Wilson%20di
sease&offset=0&size=100'
```

**Figure 2:** Curl command to execute the search for proteins and variants annotated with being associated to Wilson disease. Pagination has been set but as can be seen in Figure 1b this search only returns a single page.

```

import requests, sys

requestURL =
"https://www.ebi.ac.uk/proteins/api/variation?disease=Wilson%20di
sease&offset=0&size=100"

r = requests.get(requestURL, headers={ "Accept" :
"application/json"})

if not r.ok:
    r.raise_for_status()
    sys.exit()

responseBody = r.text
print(responseBody)

```

**Figure 3:** Python script equivalent to the curl command in Figure 2 for executing the search for proteins and variants annotated with being associated to Wilson disease. Pagination has been set but as can be seen in Figure 1b this search only returns a single page.

### **Step 2: Searching for positional annotations ‘Features’ in P35670 that could be affected by Wilson disease associated variants.**

The *Features* service was used to find any positional annotations in the region of the Wilson disease associated variant. Figure 4 shows the Swagger UI for the *Features* service with protein accession P35670 added to the accession search field. Figure 5 illustrates the results after execution of the search in the response body, with a Curl command defined that is also available in Figure 6 with Figure 7 defining a Python script to execute this search. An active site feature is annotated at aspartic acid 1027 is coincides with a Wilson disease associated variant p.Asp1027His (COSM307382), Figure 8.

features

[Show/Hide](#) | [List Operations](#) | [Expand Operations](#)

**GET** /features [get features of list of UniProt entries.](#)

**GET** /features/type/{type} [Search for features of given type and search terms.](#)

**GET** /features/{accession} [get UniProt features by accession](#)

Implementation Notes  
with categories as query parameter

Response Class (Status 200)  
successful operation

[Model](#) | [Example Value](#)

```
{
  "version": "string",
  "accession": "string",
  "entryName": "string",
  "sequence": "string",
  "sequenceChecksum": "string",
  "geteGeneId": "string",
```

Response Content Type

Parameters

| Parameter  | Value                                                              | Description                                                                                                                                                                                                                                                                                                                                                                                                        | Parameter Type | Data Type     |
|------------|--------------------------------------------------------------------|--------------------------------------------------------------------------------------------------------------------------------------------------------------------------------------------------------------------------------------------------------------------------------------------------------------------------------------------------------------------------------------------------------------------|----------------|---------------|
| accession  | <input type="text" value="P35670"/>                                | UniProt accession                                                                                                                                                                                                                                                                                                                                                                                                  | path           | string        |
| categories | <input type="text" value="Provide multiple values in new lines."/> | filtering by specified a list of category types: MOLECULE_PROCESSING, TOPOLOGY, SEQUENCE_INFORMATION, STRUCTURAL, DOMAINS_AND_SITES, PTM, VARIANT, MUTAGENESIS; separated by ','                                                                                                                                                                                                                                   | query          | Array(string) |
| types      | <input type="text" value="Provide multiple values in new lines."/> | filtering by specified a list of feature types: INIT_MET, SIGNAL, PROPEP, TRANSIT, CHAIN, PEPTIDE, TOPO_DOM, TRANSMEM, DOMAIN, REPEAT, CA_BIND, ZN_FING, DNA_BIND, NP_BIND, REGION, COILED, MOTIF, COMPBAS, ACT_SITE, METAL, BINDING, SITE, NON_STD, MOD_RES, LIPID, CARBOHYD, DISULFID, CROSSLNK, VAR_SEQ, VARIANT, MUTAGEN, UNSURE, CONFLICT, NON_CONS, NON_TER, HELIX, TURN, STRAND, INTRAMEM; separated by ',' | query          | Array(string) |

[Response Messages](#) | [Show Response](#)

[Try it out!](#)

**Figure 4:** Features service search by accession. Here we are searching for all positional annotations available for the protein P35670 but it is possible to use the optional search fields to restrict to specific types of 'features'.

Request Sample Code

[Curl](#) | [Perl](#) | [Python](#) | [Ruby](#) | [Java](#)

```
curl -X GET --header 'Accept:application/json'
'https://www.ebi.ac.uk/proteins/api/features/P35670'
```

Request URL

```
https://www.ebi.ac.uk/proteins/api/features/P35670
```

Response Body

```
{
  "accession": "P35670",
  "entryName": "ATP7B_HUMAN",
  "sequence":
"MPEQERQITAREGASRKILSKLSLPTRAWEPAMKKSFAFDNVGYEGGLDGLGPSQVATSTVRIILGMCQSCVKSIEDRI
SNLKGIIISMKVSLEQGSATVKYVPSVVCLQQVCHQIGDMGFEASIAEGKAASWPSRSLPAQEAVVKLRVEGMCQSCVSSI
EGKVRXLQGVVVRVKSLSNQEAVITYQPYLIQPEDLRDHVNDMGFEAAIKSKVAPLSLGPIDIERLQSTNPKRPLSSANQN
FNNSETLGHQGSVVTLQLRIDGMHCKSCVLNIEENIGQLLGVQSIQVSLENKTAQVKYDPSCSTPVALQRAIEALPPGNF
XVSLPDGAEGSGTDRSSSSHSPPGSPPRNQVQTCSTTLIAIAGMTCASCVHSIEGMISQLEGVQQISVSLAEGTATVLYN
PSVISPEELRAAIEDMGFEASVVSESCSTNPLGNHSAGNSMVQTTDGTPTSVQEVAPHTGRLPANHAPDILAKSPQSTRAV
APQKCFIQIKGMCASCVSNIERNLQKEAGVLSVLVALMAGKAEIKYDPEVIQPLEIAQFIQDLGFEAAVMEDYAGSDGNI
ELTITGMCASCVHNIESKLRTRNGITYASVALATSKALVKPDPEIIGPRDIIKIIIEIGPHASLAQRNPNAHLDHKMEI
KQWKKSFCLSLVFGIPVMALMIYMLIPSNEPHQSMVLDHNIIPGLSILNLIFFILCTFVQLLGGWYFYVQAYKSLRHRSAN
MDVLIVLATSIAVYVSLVILVVAVAEGAERSPVTFPDTFPMPLVFVIALGRWLEHLAKSXTSEALAKLMSLQATEATVVTLG
```

Response Code

```
200
```

Response Headers

```
{
  "content-type": "application/json",
  "x-uniprot-release": "2017_03"
}
```

**Figure 5:** Results from the search for 'features' in P35670.

```
curl -X GET --header 'Accept:application/json'
'https://www.ebi.ac.uk/proteins/api/features/P35670'
```

**Figure 6:** Curl command to execute the search for protein features dynamically generated by the Swagger UI as illustrated in Figure 5.

```

import requests, sys

requestURL =
"https://www.ebi.ac.uk/prot eins/api/features/P35670"

r = requests.get(requestURL, headers={ "Accept" :
"application/json"})

if not r.ok:
    r.raise_for_status()
    sys.exit()

responseBody = r.text
print(responseBody)

```

**Figure 7:** Python script equivalent to the curl command in Figure 6 for executing the search for proteins features in P35670.

```

{
  "type": "VARIANT",
  "description": "[LSS_COSMIC]: primary tissue(s): kidney",
  "alternativeSequence": "H",
  "begin": "1027",
  "end": "1027",
  "xrefs": [
    {
      "name": "cosmic curated",
      "id": "COSM307382",
      "url": "http://cancer.sanger.ac.uk/cosmic/mutation/overview?id=307382"
    }
  ],
  "evidences": [
    {
      "code": "ECO:0000313",
      "source": {
        "name": "cosmic_study",
        "id": "COSU:410",
        "url": "http://cancer.sanger.ac.uk/cosmic/study/overview?study_id=410"
      }
    },
    {
      "code": "ECO:0000313",
      "source": {
        "name": "PubMed",
        "id": "22683710"
      }
    }
  ]
}

```

**Figure 8:** Identification of a variant at residue 1027 that is associated to Wilson disease and a COSMIC cancer associated variant from the large scale study variant data sets. Aspartic acid 1027 has been annotated as the active site residue.

### Step 3: Proteomics Search for unique peptides around residue aspartic acid 1027 in P35670.

The *Proteomics* service was used to find any unique peptides in the region of residue Aspartic acid 1027. Figure 9 shows the Swagger UI for the *Proteomics* service with protein accession P35670 added to the accession search field. Figure 10 illustrates the results after execution of the search in the response body, with a Curl command defined that is also available in Figure 11 with Figure 12 defining a Python script to execute this search. Table 1 summarises the seven unique peptides found upstream of the active site at aspartic acid 1027.

proteomics [Show/Hide](#) [List Operations](#) [Expand Operations](#)

GET /proteomics [Get proteomics peptides of list of UniProt accessions.](#)

Implementation Notes  
With query feature type and query terms

Response Class (Status 200)  
successful operation

Model **Example Value**

```

{
  {
    "version": "string",
    "accession": "string",
    "entryName": "string",
    "sequence": "string",
    "sequenceChecksum": "string",
    "geteGeneId": "string",
    "geteProteinId": "string",
    "taxid": 0,
    "features": [
      {
        "type": "string",

```

Response Content Type

Parameters

| Parameter | Value                               | Description                                                                                               | Parameter Type | Data Type |
|-----------|-------------------------------------|-----------------------------------------------------------------------------------------------------------|----------------|-----------|
| offset    | <input type="text" value="0"/>      | Off set, page starting point, with default value 0                                                        | query          | integer   |
| size      | <input type="text" value="100"/>    | Page size with default value 100. When page size is -1, it returns all records and offset will be ignored | query          | integer   |
| accession | <input type="text" value="P35670"/> | Search for accession, can be a list separated by ','                                                      | query          | string    |
| taxid     | <input type="text"/>                | Organism taxonomy id                                                                                      | query          | string    |
| upid      | <input type="text"/>                | UniProt proteome id: UP[0-9]{9}                                                                           | query          | string    |

**Figure 9:** *Proteomics* service Swagger UI with 'P35670' entered in to the accession search field.

|            |                                     |                                                                                         |       |        |
|------------|-------------------------------------|-----------------------------------------------------------------------------------------|-------|--------|
| accession  | <input type="text" value="P35670"/> | Search for accession, can be a list separated by ','                                    | query | string |
| taxid      | <input type="text"/>                | Organism taxonomy id                                                                    | query | string |
| upid       | <input type="text"/>                | UniProt proteome Id: UP[0-9]{9}                                                         | query | string |
| datasource | <input type="text"/>                | Proteomics data source, can be list, separated by ','                                   | query | string |
| peptide    | <input type="text"/>                | Proteomics peptide                                                                      | query | string |
| unique     | <input type="text"/>                | If unique, a peptide is mapped to one gene group only. Value can only be true or false. | query | string |

Response Messages [Show Response](#)  
[Hide Response](#)

Request Sample Code

[Curl](#) | [Perl](#) | [Python](#) | [Ruby](#) | [Java](#)

```
curl -X GET --header 'Accept:application/json' 'https://www.ebi.ac.uk/proteins/api/proteomics?offset=0&size=100&accession=P35670'
```

Request URL

```
https://www.ebi.ac.uk/proteins/api/proteomics?offset=0&size=100&accession=P35670
```

Response Body

```
{
  {
    "accession": "P35670",
    "entryName": "ATP7B_HUMAN",
    "sequence":
    "MPEQERQITAREGASRKILSKLSLPTRAWEPAMKKSFAFDNVGYEGGLDGLPSSQVATSTVIRILGMCQCQSCVKSIEDRISNLKGIISMKRVSLEQGSATVKYVPSVVCVLCQQV
    CHQIGDMGFEASIAEGKAASWFSRSLPAQEAVVKLRVEGMCQCQSCVSSIEGKVRRLQGVVVRKVSLSNQEAVITYQPYLIQPEDLRHDVNDMGFEAAIKSKVAPLSLGPIDIE
    RLQSTNPKRPLSSANQNFNNSSETLGHQGSVVTLQLRIDGMHCKSCVLNIEENIQQLGVQSIQVLENKTAQVKYDPSCTSPVALQRAIEALPPGNFKVSLPDGAEQSGTDH
    RSSSSHSFGSPFRNQVQCCTCSTTLIAIAGMTCASCVHSIEGMSIQLEGVQQISVSLAEGTAVLYNPSVISPEELRAAIEDMGFEASVVSSECSSTNPLGNHSAGNSMVQTTDG
    TPTSVQEVAPHTGRLPANHAPDILAKSPQSTRAVAPQKCFLQIKGMCASCVSNIEENLQKEAGVLSVLVALMAGKAEIKYDPEVIQPLEIAQFIQDLGFEAAVMEDYAGSDG
    NIELTIIGMTCASCVHNIESKLRTRTNGITYASVALATSKALVKFDPEIIGPRDIIKIIIEEIGFHASLAQRNPNNAHLDHKMEIKQWKKSLCPLSLVFGIPVMALMIYMLIPSN
    PHQSMVLDHNIIPGLSILNLIFFILCTFVQLGGWYFYVQAYKSLRHSANMDVLIVLATSIAVYVSLVILVVAVAEKERSPVTFDDTPPMLFVPIALGRWLEHLAKSKTSE
    ALAKXMSLQATEATVTVLGEDNLIREEQVPMELVQRGDIVKVVPGKFPVVDGKLEGNMDESLITGEAMPVTKKPGSTVIAGSINAGSVLIKATHVGNDDTLAQIVKLV
    BEAQMSKAPIQLLADRFSGYFVFFIIIMSTLTLVVWIVIGFIDFGVVQRYFPNPNKHISQTEVIIRFAFQTSITVLCIACPCSLGLATPTAVMVGTGVAAQNGILIRGGKPLE
    MAHKIKTVMFDRTGTITHGVPVVRVLLGDVATLPLRKLAVVGTAEASSEHPLGVAVTKYCKEELGTELTGVCTDPQAVPCCGICGCKVSNVEGILAHSERPLSAPASHLNE
    AGSLFAEKDAVPQTFSVLIGNREWLRRNGLTISSDVSDAMTDHEMKQGTAILVAIDGVLGCMIAIADAVKQEAALAVHTLQSMGVDVVLTGDNRRKTARAIATQVGINKVFAB
    VLPESHVARVQELQNRKXVAMVGDGNDSPALAQADMVVAIGTGDVAIEAADVVLIRNDLLDVAASIHLSKRTVRRIRINLVLALYINLVGPIAAGVFMPIGIVLQFWMG
    SAAMAASSVSVLSSLQKCYKPKDLERYEAQAHGHMPLTASQVSVHIGMDRRWRDSPRATPNDQVSVQVSVLSLSDXKPSRHSAAADDDGDKWLSLLNLRDDEEQYI",
    "sequenceChecksum": "419145448F9E959A",
  }
}
```

Response Code

```
200
```

Response Headers

```
{
  "x-pagination-totalrecords": "1",
  "link": "<http://www.ebi.ac.uk/proteins/api/proteomics?offset=0&size=100&accession=P35670>; rel='self'",
  "<http://www.ebi.ac.uk/proteins/api/proteomics?offset=0&size=100&accession=P35670>; rel='first'",
  "<http://www.ebi.ac.uk/proteins/api/proteomics?offset=0&size=100&accession=P35670>; rel='last'",
  "content-type": "application/json"
}
```

**Figure 10:** Results from executing the search for peptides.



```
curl -X GET --header 'Accept:application/json'
'https://www.ebi.ac.uk/proteins/api/proteomics?offset=0&size=100&accessi
on=P35670'
```

**Figure 11:** Curl command to execute the search for proteomics peptides dynamically generated by the Swagger UI as illustrated in Figure 10.

```
import requests, sys

requestURL =
'https://www.ebi.ac.uk/proteins/api/proteomics?offset=0&size=100&accessi
on=P35670'

r = requests.get(requestURL, headers={ "Accept" : "application/json"})

if not r.ok:
    r.raise_for_status()
    sys.exit()

responseBody = r.text
print(responseBody)
```

**Figure 12:** Python script equivalent to the curl command in Figure 11 for executing the search for proteins features in P35670.

| Peptide position in P35670 | LSS proteomics sources | Peptide sequence                 |
|----------------------------|------------------------|----------------------------------|
| 1042 - 1054                | MaxQB, PeptideAtlas    | VLLLGDVATLPLR                    |
| 1042 - 1055                | MaxQB, PeptideAtlas    | VLLLGDVATLPLRK                   |
| 1056 - 1077                | MaxQB, PeptideAtlas    | VLAVVGTAEASSEHPLGVAVTK           |
| 1106 - 1137                | PeptideAtlas           | VSNVEGILAHSERPLSAPASHLNEAGSLPAEK |
| 1229 - 1238                | MaxQB, PeptideAtlas    | AIATQVGINK                       |
| 1302 - 1315                | MaxQB                  | NDLLDVVASIHLSK                   |
| 1416 - 1440                | PeptideAtlas           | ATPWDQVSYVSQVSLSSLTSDKPSR        |

**Table 1:** Unique peptides upstream of active site at residue 1027. Sources for the experimental evidence of the peptide are from either MaxQB or PeptideAtlas.

#### Step 4: Searching for ATP7B orthologues

The *Proteins* service was used to find any orthologues of human APT7B by searching by gene name. Figure 13 shows the Swagger UI for the *Proteins* service with gene name ATP7B added to the gene search field. Figure 14 illustrates the results after execution of the search in the response body, with a Curl command defined that is also available in Figure 15 with Figure 16 defining a Python script to execute this search. Figure 17 summarises the sequence identity of 83.59% between the two protein sequences when aligned by Clustal Omega. The full sequence alignment of the two protein sequences is shown in Figure 18.

```
curl -X GET --header 'Accept:application/xml'  
'https://www.ebi.ac.uk/proteins/api/proteins?offset=0  
&size=-1&gene=Atp7b'
```

**Figure 15:** Curl command to execute the search for protein orthologues dynamically generated by the Swagger UI as illustrated in Figure 16. Here due to the large amount of data returned the pagination has been 'switch-off' using the size=-1 option. Users are recommended to use the pagination option in their scripts.

```
import requests, sys  
  
requestURL =  
"https://www.ebi.ac.uk/proteins/api/proteins?offset=0  
&size=-1&gene=Atp7b"  
  
r = requests.get(requestURL, headers={ "Accept" :  
"application/xml"})  
  
if not r.ok:  
    r.raise_for_status()  
    sys.exit()  
  
responseBody = r.text  
print(responseBody)
```

**Figure 16:** Dynamically generated python script for searching for proteins from the ATP7B gene across all species. Note that in this example pagination has been switched off so all the results can be returned in a single response (size=-1). Users are recommended to use the pagination option in their scripts.

## Proteins

The proteins service provides an interface for accessing UniProtKB(?) entries and UniProtKB(?) isoform entries. The features service provides protein functional annotations from UniProt Knowledgebase (UniProtKB) protein entries. The variation, proteomics and antigen services provide annotations imported and mapped from Large Scale data Sources (LS) such as 1000Genomes, ExAC, PeptideAtlas, MaxQB and HPA along with UniProtKB annotations for these feature types (if applicable).

The Proteins service returns XML, JSON and FASTA formatted results. Features, variation, proteomics and antigen all return XML, JSON and GFF formatted results.

[proteins](#) [Show/Hide](#) [List Operations](#) [Expand Operations](#)

**GET** /proteins [get list of UniProt entries](#)

Implementation Notes  
with search query

Response Class (Status 200)  
successful operation

[Model](#) [Example Value](#)

```
<?xml version="1.0" encoding="UTF-8"?><uniprot xmlns="http://uniprot.org/uniprot"
xmlns:xsi="http://www.w3.org/2001/XMLSchema-instance"
xsi:schemaLocation="http://uniprot.org/uniprot
http://www.uniprot.org/support/docs/uniprot.xsd"><entry
xmlns="http://uniprot.org/uniprot" version="108" modified="2016-05-11"
created="2006-03-07" dataset="Swiss-Prot"><accession>Q95XB0-3</accession>
<name>MXS1-3_HUMAN</name><protein><recommendedName><fullName>Isoform 3 of Meckel
```

Response Content Type

Parameters

| Parameter | Value                              | Description                                                                                               | Parameter Type | Data Type |
|-----------|------------------------------------|-----------------------------------------------------------------------------------------------------------|----------------|-----------|
| offset    | <input type="text" value="0"/>     | Off set, page starting point, with default value 0                                                        | query          | integer   |
| size      | <input type="text" value="-1"/>    | Page size with default value 100. When page size is -1, it returns all records and offset will be ignored | query          | integer   |
| accession | <input type="text"/>               | search for accession, can be a list separated by ','                                                      | query          | string    |
| reviewed  | <input type="text"/>               | Reviewed(true) or not Reviewed (false)                                                                    | query          | string    |
| isoform   | <input type="text"/>               | 0 for exclude isoform, 1 for isoform only and 2 for both canonical and isoform.                           | query          | integer   |
| goterms   | <input type="text"/>               | GO ontology terms                                                                                         | query          | string    |
| keywords  | <input type="text"/>               | keywords                                                                                                  | query          | string    |
| ec        | <input type="text"/>               | UniProt EC number                                                                                         | query          | string    |
| gene      | <input type="text" value="Atp7b"/> | UniProt gene name                                                                                         | query          | string    |

**Figure 13:** Proteins service Swagger UI with 'ATP7B' entered in to the gene search field. Note that the search is case insensitive.

|          |                                    |                             |       |        |
|----------|------------------------------------|-----------------------------|-------|--------|
| ec       | <input type="text"/>               | UniProt EC number           | query | string |
| gene     | <input type="text" value="Atp7b"/> | UniProt gene name           | query | string |
| protein  | <input type="text"/>               | UniProt protein name        | query | string |
| organism | <input type="text"/>               | Organism name               | query | string |
| taxid    | <input type="text"/>               | Organism taxonomy id        | query | string |
| pubmed   | <input type="text"/>               | UniProt reference pubmed id | query | string |

Response Messages [Show Response](#)  
[Hide Response](#)  
[Try it out!](#)

Request Sample Code  
[Curl](#) [Perl](#) [Python](#) [Ruby](#) [Java](#)

```
curl -X GET --header 'Accept:application/xml'
'https://www.ebi.ac.uk/protins/api/protins?offset=0&size=-1&gene=Atp7b'
```

Request URL

```
https://www.ebi.ac.uk/protins/api/protins?offset=0&size=-1&gene=Atp7b
```

Response Body

```

XPDLERYEAQAHGMRKPLSASQVSVHVGMDRRRDSPRATPWDQVSVYVQVLSLSTSDRLSRHGGMAEDGGDKWSLLSD
RDEEQCI</sequence>
</entry>
<entry xmlns="http://uniprot.org/uniprot" version="163" modified="2017-03-15"
created="2000-12-08" dataset="Swiss-Prot">
  <accession>Q64446</accession>
  <accession>B1AQ56</accession>
  <name>ATP7B_MOUSE</name>
  <protein>
    <recommendedName>
      <fullName>Copper-transporting ATPase 2</fullName>
      <ecNumber evidence="2">3.6.3.54</ecNumber>
    </recommendedName>
    <alternativeName>
      <fullName>Copper pump 2</fullName>
    </alternativeName>
  </protein>
</entry>

```

Response Code

```
200
```

Response Headers

```
{
  "x-pagination-totalrecords": "140",
  "link": "<http://www.ebi.ac.uk/protins/api/protins?offset=0&size=-1&gene=Atp7b>;
rel=\\"self\\"<http://www.ebi.ac.uk/protins/api/protins?offset=0&size=-1&gene=Atp7b>;
rel=\\"first\\"<http://www.ebi.ac.uk/protins/api/protins?offset=-1&size=-1&gene=Atp7b>;
rel=\\"next\\"<http://www.ebi.ac.uk/protins/api/protins?offset=140&size=-1&gene=Atp7b>;
rel=\\"last\\"<http://www.ebi.ac.uk/protins/api/protins?offset=140&size=-1&gene=Atp7b>;",
  "content-type": "application/xml"
}
```

**Figure 14:** Results from executing the search for orthologue proteins in the *Proteins* service.

```
#  
#  
# Percent Identity Matrix - created by Clustal2.1  
#  
#  
  
1: P35670    100.00  83.59  
2: Q64446    83.59  100.00
```

**Figure 17:** Summary of sequence identity between human ATP7B P35670 and mouse ATP7B Q64446 proteins calculated by sequence alignment with Clustal Omega.

CLUSTAL O(1.2.4) multiple sequence alignment

|        |                                                                 |     |
|--------|-----------------------------------------------------------------|-----|
| P35670 | -----MPEQERQITAREGASRKILSKLSLPTRAWEPAMKKSFAFDNVGYEGGL           | 48  |
| Q64446 | MDPRKNLASVGTMPERQVTAKE-ASRKILSKLALPGRPWEQSMKQSFADFNVGYEGGL      | 59  |
|        | *****:*:* *****:* * * * :*:*****                                |     |
| P35670 | DGLGPSSQVATSTVRILGMTCSVCVKSIEDRISNLKGIISMKVSLEQGSATVKYVPSVVC    | 108 |
| Q64446 | DSTSS-SPAATDVVNI LGMTCCHSCVKSIEDRISS LKGIVNIKVSLEQGSATVRYVPSVMN | 118 |
|        | *. . * .* .*.*****:*****.****.:.*****:*****:                    |     |
| P35670 | LQQVCHQIGDMGFEASIAEGKAASWPSRSLPAQEAVVKLRVEGMTCQSCVSSIEGKVRKL    | 168 |
| Q64446 | LQQICLQIEDMGFEASAAEGKAASWPSRSPAQEAVVKLRVEGMTCQSCVSSIEGKIRKL     | 178 |
|        | ***:* * * ***** ***** *****:***                                 |     |
| P35670 | QGVVVRVKVSLSNQEAIVITYQPYLIQPEDLRDHVNDMGFEAAIKSKVAPLSLGPIDIERLQ  | 228 |
| Q64446 | QGVVRIKVSLSNQEAIVITYQPYLIQPEDLRDHCMDMGFEAAIKNRTAPLRGPIDVNKLE    | 238 |
|        | *****:*****:*****: *****.:.*** *****:***:                       |     |
| P35670 | STNPKRPLSSANQNFNNSETLGHQGSVVTLLQLRIDGMHCKSCV LNIEENIGQLLVQSI    | 288 |
| Q64446 | STNLKKEITVSPVQISNHFETLGHQGSYLATLPLRIDGMHCKSCV LNIEENIGQLPGVQNI  | 298 |
|        | *** * : * * * : *****:*. * ***** ***** ***** *                  |     |
| P35670 | QVSLENKTAQVKYDPSCTSPVALQRAIEALPPGNFKVSLPDGAEGSGTDHRSSSSHSPGS    | 348 |
| Q64446 | HVSLENKTAQIQYDPSCVTPMFLQTAIEALPPGHFKVSLPDGVEENEPQS-----GS       | 350 |
|        | :*****:*****.:*: * *****:*****.* . : **                         |     |
| P35670 | PPRNQVQGTCTTLIAIAGMTCASCVHSIEGMI SQLEGVQQISVSLAEGTATVLYNPSVI    | 408 |
| Q64446 | SQRHQEQGPGRTAVLTISGITCASSVQPIEDMLSQRKGVQQTISLAEGTGAVLYDPSIV     | 410 |
|        | *:* * * * :*::*:*.*****. * : * .*:** :*** * :*****.:***:***:    |     |
| P35670 | SPEELRAAIEDMGFEASVSVSESCSTNPLGNHSAGNSMVQTTDGTPTSVQEVAPHTGRLLPA  | 468 |
| Q64446 | SLDELRTAVEDMGFEVSVNSETFTINPVRNFKSGNSVPTMGDIAGSVQKMAPDTRGLPT     | 470 |
|        | * :***.*:*****.* * * : : * : * .:***: * * .. *:*:*** * * :      |     |
| P35670 | NHAPDILAKSPQSTRAVAPQKCFLOIKGMTCASCVSNIEERNLQKEAGVLSVLVALMAGKA   | 528 |
| Q64446 | HQGGPHSSETPSSPGATASQKCFVQIKGMTCASCVSNIEERLQRHAGILSVLVALMSGKA    | 530 |
|        | :*. * . :*:*. * * * :*****:*****. * :. * :*****:***             |     |
| P35670 | EIKYDPEVIQPLEIAQFIQDLGFEAAVMEDYAGSDGNIELTITGMTASCVHNIESKLTR     | 588 |
| Q64446 | EVKYDPEIIQSPRIAQLIQDLGFEASVMDNTVSEGDIELIITGMTASCVHNIESKLTR      | 590 |
|        | *:*****:* * .***:*****:**** : *:*:*** *****                     |     |
| P35670 | TNGITYASVALATSKALVKFDPEIIGPRDI IKI IEEIGFHASLAQRNPNAHLDHKMEIK   | 648 |
| Q64446 | TNGITYASVALATSKAHVKFDPEIVGPRDI IKI IEEIGFHASLAQRNPNAHLDHKTEIK   | 650 |
|        | *****:***** *****:***** ***** ***** *                           |     |
| P35670 | QWKKSFCLSLVFGIPVMALMIYMLIPSNEPHQSMVLVDHNIIPGLSVLNLIFFILCTFVQL   | 708 |
| Q64446 | QWKKSFCLSLVFGIPVMGLMVYMLIPSSPTQETMVLVDHNIIPGLSVLNLIFFILCTFVQF   | 710 |
|        | *****:*****. * :*****. * :*:*****:*****:*****:                  |     |
| P35670 | LGGWYFYVQAYKSLRHRANMDVLIVLATSIAVYVSLVILVVAEKAERSPVTFDTPP        | 768 |
| Q64446 | LGGWYFYVQAYKSLRHRANMDVLIVLATTIAYAYSLVILVVAEKAERKSPVTFDTPP       | 770 |
|        | *****:*****:*****. * * .*****:*****:*****:*****                 |     |
| P35670 | MLFVFIALGRWLEHLAKSKTSEALAKLSLQATEATVVTLGEDNLI IREEQVPMELVQRG    | 828 |
| Q64446 | MLFVFIALGRWLEHVAKSKTSEALAKLSLQATEATVVTLGEDNLI IREEQVPMELVQRG    | 830 |
|        | *****:*****:*****:*****:*****:*****:*****:*****                 |     |
| P35670 | DIVKVVPGGKFPVDGKVLGNTMADESLITGEAMPVTKKPGSTVIAGSINAHGSVLKAT      | 888 |
| Q64446 | DVIKVVPGGKFPVDGKVLGNTMADESLITGEAMPVTKKPGSIVIAGSINAHGSVLLKAT     | 890 |
|        | *.:*****:*****:***** *****:*****:***                            |     |
| P35670 | HVGNDDTLAQIVKLVVEEAQMSKAPIQQALDRFSGYFVFPFIIIMSTLTLVVWIVIGFIDFG  | 948 |
| Q64446 | HVGNDDTLAQIVKLVVEEAQMSKAPIQQALDRFSGYFVFPFIIIMSTLTLVVWIVIGFVDFG  | 950 |
|        | *****:*****:*****:*****:*****:*****:*****:*****                 |     |

|        |                                                                                                      |      |
|--------|------------------------------------------------------------------------------------------------------|------|
| P35670 | VVQRYFPNPNKHISQTEVIIIRFAFQTSITVLCIACPCSLGLATPTAVMVGTVAAQNGIL                                         | 1008 |
| Q64446 | VVQKYFPSPSKHISQTEVIIIRFAFQTSITVLCIACPCSLGLATPTAVMVGTVAAQNGVL                                         | 1010 |
|        | ***.*.*.*.*****.*                                                                                    |      |
| P35670 | IKGGKPLEMAHKIKTVMFDKGTGTITHGVPRVMRLLLLGDVATLPLRKVLAVVGTAEASSE                                        | 1068 |
| Q64446 | IKGGKPLEMAHKIKTVMFDKGTGTITHGVPRVMRLLLLADVATLPLRKVLAVVGTAEASSE                                        | 1070 |
|        | *****.*.*.*.*****.*                                                                                  |      |
| P35670 | HPLGVAVTKYCKEELGTETLGYCTDFQAVPGCGIGCKVSNVEGILAHSERPLSAPASHLN                                         | 1128 |
| Q64446 | HPLGVAVTKYCKEELGTETLGYSTDFQAVPGCGISCKVSNVEGILARSDLT-----AHPV                                         | 1125 |
|        | *****.*.*.*.*.*****.*.*.*.*.*                                                                        |      |
| P35670 | EAGSLPAEKDAVPQTFVLIIGNREWLRRNGLTISSDVS DAMTDHEMKGQTAILVAIDGVL                                        | 1188 |
| Q64446 | GVGNPPTGEGAGPQTFVLIIGNREWMRRNGLTISSDISDAMTDHEMKGQTAILVAIDGVL                                         | 1185 |
|        | .*. * : .*. *****.*.*.*.*.*.*.*.*.*.*.*.*.*.*.*.*.*.*.*.*.*.*                                        |      |
| P35670 | CGMIAIADAVKQEALAVHTLQSMGVDVVLITGDNRKTRARAIATQVGINKVFAEVLPSHK                                         | 1248 |
| Q64446 | CGMIAIADAVKPEAALAIYTLKSMGVDVALITGDNRKTRARAIATQVGINKVFAEVLPSHK                                        | 1245 |
|        | *****.*.*.*.*.*.*.*.*.*.*.*.*.*.*.*.*.*.*.*.*.*.*.*.*.*.*.*.*.*                                      |      |
| P35670 | VAKVQELQNKGGKVMVGDGVNDSPALAQADMGVAIGTGT DVAIEAADVVLIRNDLLDVV                                         | 1308 |
| Q64446 | VAKVQELQNEGKKVMVGDGVNDSPALAQADVGIAGTGT DVAIEAADVVLIRNDLLDVV                                          | 1305 |
|        | *****.*.*.*.*.*.*.*.*.*.*.*.*.*.*.*.*.*.*.*.*.*.*.*.*.*.*.*.*.*                                      |      |
| P35670 | ASIHLSKRTVRRIRINLVLALIYNLVGIP I AAGVFMP I GIVLQ P W M G S A A M A A S S V S V L                      | 1368 |
| Q64446 | ASIHLSKRTVRRIRVNLV L A L I Y N M V G I P I A A G V F M P I G I V L Q P W M G S A A M A A S S V S V L | 1365 |
|        | *****.*.*.*.*.*.*.*.*.*.*.*.*.*.*.*.*.*.*.*.*.*.*.*.*.*.*.*.*.*                                      |      |
| P35670 | SSLQLKCYKPKDLERYEAQAHGHMKPLTASQVSVHIGMDDRRWRDSPRATPVDQVSVYSQV                                        | 1428 |
| Q64446 | SSLQLKCYRKPDLERYEAQAHGRMKPLSASQVSVHIGMDDRRRRDSPRATAWDQVSVYSQV                                        | 1425 |
|        | *****.*.*.*.*.*.*.*.*.*.*.*.*.*.*.*.*.*.*.*.*.*.*.*.*.*.*.*.*.*                                      |      |
| P35670 | SLSSLTSDKPSRHSAAADDDGDKWSLLLNDRDEEQYI                                                                | 1465 |
| Q64446 | SLSSLTSDRLSRHGGAAEDGGDKWSLLLSRDEEQCI                                                                 | 1462 |
|        | *****.*.*.*.*.*.*.*.*.*.*.*.*.*.*.*.*.*.*.*.*.*.*.*.*.*.*.*.*.*                                      |      |

**Figure 18:** Sequence alignment of human ATP7B protein P35670 and mouse ATP7B protein Q64446 by Clustal Omega. As summarised in Figure 17 the two proteins are 83.59% identical.

### Step 5: Gene structure analysis using *Coordinates* service

The *Coordinates* service was used to retrieve genomic coordinates mapped to both the human APT7B protein P35670 and mouse ATP7B protein Q64446 searching by accession. Figure 19 shows the Swagger UI for the *Coordinates* service with accession P35670 added to the accession search field and the results after execution of the search in the response body, with a Curl command defined that is also available in Figure 20 with Figure 21 defining a Python script to execute this search. The equivalent coordinate search for mouse ATP7B protein Q64446 is shown in Figure 22, with the dynamically generated curl command and python script in Figures 23 and 24 respectively. Both P35670 and Q64446 genes consist of 21 exons with the active site residue in both proteins being found in the fourteenth exon. Therefore, we can be confident that other sequence features are related between the two proteins.

**GET** /coordinates/{accession} [Get Genome Coordinates by accession.](#)

Response Class (Status 200)  
successful operation

[Model](#) | [Example Value](#)

```
{
  "accession": "string",
  "name": "string",
  "taxid": 0,
  "sequence": "string",
  "protein": {
    "recommendedName": {
```

Response Content Type

Parameters

| Parameter        | Value                               | Description              | Parameter Type | Data Type |
|------------------|-------------------------------------|--------------------------|----------------|-----------|
| <b>accession</b> | <input type="text" value="P35670"/> | <b>UniProt accession</b> | path           | string    |

Response Messages [Show Response](#)  
[Hide Response](#)

[Try it out!](#)

Request Sample Code

[Curl](#) | [Perl](#) | [Python](#) | [Ruby](#) | [Java](#)

```
curl -X GET --header 'Accept:application/json'
'https://www.ebi.ac.uk/protiens/api/coordinates/P35670'
```

Request URL

```
https://www.ebi.ac.uk/protiens/api/coordinates/P35670
```

Response Body

```
"gnCoordinate": {
  {
    "genomicLocation": {
      "exon": {
        {
          "proteinLocation": {
            "begin": {
              "position": 1,
              "status": "certain"
            },
            "end": {
              "position": 17,
              "status": "certain"
            }
          }
        },
      },
    },
  },
}
```

**Figure 19:** *Coordinates* service Swagger UI with the human protein identifier P35670 entered in to the accession search field. The results body contains the protein and matching genomic coordinates for the protein.



```
curl -X GET --header 'Accept:application/json'  
'https://www.ebi.ac.uk/telemetry/api/coordinates/P3567  
0'
```

**Figure 20:** Curl command to execute the search for mapped genomic coordinates for P35670 dynamically generated by the Swagger UI as illustrated in Figure 19.

```
import requests, sys  
  
requestURL =  
"https://www.ebi.ac.uk/telemetry/api/coordinates/P3567  
0"  
  
r = requests.get(requestURL, headers={ "Accept" :  
"application/json"})  
  
if not r.ok:  
    r.raise_for_status()  
    sys.exit()  
  
responseBody = r.text  
print(responseBody)
```

**Figure 21:** Dynamically generated python script for searching for the genomic coordinates for protein P35670.

GET /coordinates/{accession} [Get Genome Coordinates by accession.](#)

Response Class (Status 200)  
successful operation

Model [Example Value](#)

```
{
  "accession": "string",
  "name": "string",
  "taxid": 0,
  "sequence": "string",
  "protein": {
    "recommendedName": {
```

Response Content Type

Parameters

| Parameter | Value                               | Description       | Parameter Type | Data Type |
|-----------|-------------------------------------|-------------------|----------------|-----------|
| accession | <input type="text" value="Q64446"/> | UniProt accession | path           | string    |

Response Messages [Show Response](#)  
[Hide Response](#)

[Try it out!](#)

Request Sample Code

[Curl](#) [Perl](#) [Python](#) [Ruby](#) [Java](#)

```
curl -X GET --header 'Accept:application/json'
'https://www.ebi.ac.uk/protins/api/coordinates/Q64446'
```

Request URL

Response Body

```
{
  "accession": "Q64446",
  "name": "ATP7B_MOUSE",
  "taxid": 10090,
  "sequence":
  "MDPRKNLASVGTMPQERQVTAKEASRKILSKLALPGRPWEQSMKQSFAPDNVGYEGGLDSTSSPAATDVVNILGMTCH
  SCVRSIEDRISSLKGI VNIKVLSLEQGSATVRYVPSVMNLQQLQIEDMGFEASAABGKAASWFSRSSPAQEAVVKLRVEG
  MTCQSCVSSIEGKIRKLQGVVRIKVSLSNQEAVITYQPYLIQPEDLRDHICDMGFEAAIKNRTAPLRLGPI DVNKLESTNL
  KKETVSPVQISNHFETLGHQGSYLATLPLRIDGMHCKSCVLNIEGNIGQLPGVQNIHVSLNKTAQIQYDPSCVTPMFLQT
  AIEALPPGHFKVSLPDGVEENEPQSGSSQRHQEQGPGRTAVLTISGITCASSVQPIEDMLSQRKGVQQTSLSLAEGTGAVL
  YDPSIVSLDELRTAVEDMGFEVSNVSETFTINPVANFKSGNSVPTMGDIAGSVQKMAPDTRGLPTHQGPGHSSETPSSPG
  ATASQKCFVQIKGMTCASCVSNIERSLQRHAGILSVLVALMSGKAEVKYDPEIIQSPRIAQLIQDLGFEASVMEDNTVSEG
  DIELIITGMTCASCVHNIESKLRTRNGITYASVALATSKAHVKFDPEIVGPRDIIKIIIEIGFHASLAQRNPNNAHLDHKT
  EIKQWXXSFLCSLVFGIPVMGLMVMYMLIPSSTPQETMVL DHNIIPGLSVLNLIFPILCTFVQPLGGWYFYVQAYKSLRHRS
```

Response Code

**Figure 22:** Coordinates service Swagger UI with the mouse protein identifier Q64446 entered in to the accession search field. The results body contains the protein and matching genomic coordinates for the protein.

```
curl -X GET --header 'Accept:application/json'  
'https://www.ebi.ac.uk/proteins/api/coordinates/Q6444  
6'
```

**Figure 23:** Curl command to execute the search for mapped genomic coordinates for P35670 dynamically generated by the Swagger UI as illustrated in Figure 19.

```
import requests, sys  
  
requestURL =  
"https://www.ebi.ac.uk/proteins/api/coordinates/Q6444  
6"  
  
r = requests.get(requestURL, headers={ "Accept" :  
"application/json"})  
  
if not r.ok:  
    r.raise_for_status()  
    sys.exit()  
  
responseBody = r.text  
print(responseBody)
```

**Figure 24:** Dynamically generated python script for searching for the genomic coordinates for protein Q64446.

### **Step 6: Mouse Q64446 variant search and comparison to P35670**

The *Variation* service was used to retrieve any variants for mouse ATP7B protein Q64446 by searching with the protein accession. Figure 25 shows the Swagger UI for the *Variation* service with accession Q64446 added to the accession search field. Results after execution of the search are shown in Figure 26, where the mouse variant p.R1040K is shown as it is equivalent to the human p.R1038K Wilson disease associated variant. The curl command to execute the search is defined in Figure 27 with Figure 28 defining a Python script to execute this search.

**GET** /variation/{accession} get UniProt variation features by accession

Implementation Notes  
with categories as query parameter

Response Class (Status 200)  
successful operation

Model [Example Value](#)

```

{
  "version": "string",
  "accession": "string",
  "entryName": "string",
  "sequence": "string",
  "sequenceChecksum": "string",
  "geteGeneId": "string",
}

```

Response Content Type

Parameters

| Parameter            | Value                               | Description                                                                                                                                                                      | Parameter Type | Data Type |
|----------------------|-------------------------------------|----------------------------------------------------------------------------------------------------------------------------------------------------------------------------------|----------------|-----------|
| accession            | <input type="text" value="Q64446"/> | UniProt accession                                                                                                                                                                | path           | string    |
| sourcetype           | <input type="text"/>                | Filter for variants from a specific sourceType. Options include: uniprot, large_scale_study and mixed, or individual data source such as exac, cosmic curated, esp, 1000genomes. | query          | string    |
| consequencetype      | <input type="text"/>                | Filter for variants with a specific consequenceType. Options include: missense, stop gained or stop lost                                                                         | query          | string    |
| wildtype             | <input type="text"/>                | Search by specific wildType amino acid. Options: Any single letter amino acid and * for stop codon.                                                                              | query          | string    |
| alternativesequences | <input type="text"/>                | Filter by specific alternativeSequence amino acid. Options: Any single letter amino acid and * for stopcodon and - for deletions.                                                | query          | string    |
| location             | <input type="text"/>                | Filter by amino acid position in the sequence(s). Options: any valid amino acid position within the length of the protein sequence                                               | query          | string    |

Response Messages [Show Response](#)  
[Hide Response](#)

[Try it out!](#)

**Figure 25:** Variation service Swagger UI with the mouse protein identifier Q64446 entered in to the accession search field.

Response Messages [Show Response](#)  
[Hide Response](#)  
[Try it out!](#)

Request Sample Code  
[Curl](#) [Perl](#) [Python](#) [Ruby](#) [Java](#)

```
curl -X GET --header 'Accept:application/json'  
'https://www.ebi.ac.uk/teins/api/variation/Q64446'
```

Request URL  
<https://www.ebi.ac.uk/teins/api/variation/Q64446>

Response Body

```
{  
  "genomicLocation": "NC_000074.6:g.22011059C>T",  
  "sourceType": "large_scale_study"  
},  
{  
  "type": "VARIANT",  
  "alternativeSequence": "K",  
  "begin": "1040",  
  "end": "1040",  
  "xrefs": [  
    {  
      "name": "dbSNP",  
      "id": "rs239532167",  
      "url": "http://www.ncbi.nlm.nih.gov/SNP/snp_ref.cgi?  
type=rs&rs=rs239532167"  
    }  
  ]  
}
```

[Response Code](#)

**Figure 26:** Results from the *Variation* search with the mouse protein identifier Q64446. In the response body is the mouse equivalent variant p.R1040K to the human p.R1038K Wilson disease associated variant.

```
curl -X GET --header 'Accept:application/json'  
'https://www.ebi.ac.uk/teins/api/variation/Q64446'
```

**Figure 27:** Curl command to execute the search for variant for Q64446 dynamically generated by the Swagger UI as illustrated in Figure 26.

```
import requests, sys

requestURL =
"https://www.ebi.ac.uk/proteins/api/variation/Q64446"

r = requests.get(requestURL, headers={ "Accept" :
"application/json"})

if not r.ok:
    r.raise_for_status()
    sys.exit()

responseBody = r.text
print(responseBody)
```

**Figure 28:** Dynamically generated python script for searching for variants for protein Q64446.

### **Step 7: Mouse proteomics peptide search**

The *Proteomics* service was used to retrieve any peptides for mouse ATP7B protein Q64446 by searching with the protein accession. Figure 29 shows the Swagger UI for the *Proteomics* service with accession Q64446 added to the accession search field. Results after execution of the search are shown in Figure 30, where the mouse protein has an equivalent unique peptide between residues 1044-1057 to the unique peptide 1042-1054 in the human ATP7B protein P35670. Where a peptide is defined as unique if it not found in another protein, not including isoforms, in the organisms' proteome. Unique peptides from different species can be the same. The curl command to execute the search is defined in Figure 31 with Figure 32 defining a Python script to execute this search.

GET /proteomics Get proteomics peptides of list of UniProt accessions.

Implementation Notes  
With query feature type and query terms

Response Class (Status 200)  
successful operation

Model [Example Value](#)

```

{
  "version": "string",
  "accession": "string",
  "entryName": "string",
  "sequence": "string",
  "sequenceChecksum": "string",
  "geteGeneId": "string",
  "geteProteinId": "string",
}

```

Response Content Type application/json

Parameters

| Parameter  | Value                               | Description                                                                                               | Parameter Type | Data Type |
|------------|-------------------------------------|-----------------------------------------------------------------------------------------------------------|----------------|-----------|
| offset     | <input type="text" value="0"/>      | Off set, page starting point, with default value 0                                                        | query          | integer   |
| size       | <input type="text" value="100"/>    | Page size with default value 100. When page size is -1, it returns all records and offset will be ignored | query          | integer   |
| accession  | <input type="text" value="Q64446"/> | Search for accession, can be a list separated by ','                                                      | query          | string    |
| taxid      | <input type="text"/>                | Organism taxonomy id                                                                                      | query          | string    |
| upid       | <input type="text"/>                | UniProt proteome Id: UP[0-9][9]                                                                           | query          | string    |
| datasource | <input type="text"/>                | Proteomics data source, can be list, separated by ','                                                     | query          | string    |
| peptide    | <input type="text"/>                | Proteomics peptide                                                                                        | query          | string    |
| unique     | <input type="text"/>                | If unique, a peptide is mapped to one gene group only. Value can only be true or false.                   | query          | string    |

Response Messages [Show Response](#)  
[Hide Response](#)

[Try it out!](#)

**Figure 29:** Proteomics service Swagger UI with the mouse protein identifier Q64446 entered in to the accession search field.

Request Sample Code

[Curl](#) | [Perl](#) | [Python](#) | [Ruby](#) | [Java](#)

```
curl -X GET --header 'Accept:application/json'
'https://www.ebi.ac.uk/proteins/api/proteomics?offset=0&size=100&accession=Q64446'
```

Request URL

```
https://www.ebi.ac.uk/proteins/api/proteomics?offset=0&size=100&accession=Q64446
```

Response Body

```
{
  "type": "PROTEOMICS",
  "begin": "1044",
  "end": "1057",
  "xrefs": [
    {
      "name": "Proteomes",
      "id": "UP000000589",
      "url": "http://www.uniprot.org/proteomes/UP000000589"
    }
  ],
  "evidences": [
    {
      "code": "ECO:0000213",
      "source": {

```

Response Code

```
200
```

Response Headers

```
{
  "x-pagination-totalrecords": "1",
  "link": "<http://www.ebi.ac.uk/proteins/api/proteomics?offset=0&size=100&accession=Q64446>; rel='self'",
  "<http://www.ebi.ac.uk/proteins/api/proteomics?offset=0&size=100&accession=Q64446>; rel='first'",
  "<http://www.ebi.ac.uk/proteins/api/proteomics?offset=0&size=100&accession=Q64446>; rel='last'",
  "content-type": "application/json"
}
```

**Figure 30:** Results from the *Proteomics* search with the mouse protein identifier Q64446. In the response body is the mouse unique peptide starting at residue 1044.

```
curl -X GET --header 'Accept:application/json'
'https://www.ebi.ac.uk/proteins/api/proteomics?offset=0&size=100&accession=Q64446'
```

**Figure 31:** Curl command to execute the search for peptides for Q64446 dynamically generated by the Swagger UI as illustrated in Figure 30.



```
import requests, sys

requestURL =
"https://www.ebi.ac.uk/proteins/api/proteomics?offset
=0&size=100&accession=Q64446"

r = requests.get(requestURL, headers={ "Accept" :
"application/json"})

if not r.ok:
    r.raise_for_status()
    sys.exit()

responseBody = r.text
print(responseBody)
```

**Figure 32:** Dynamically generated python script for searching for unique peptides for protein Q64446.
